# Supplementary material for: Protic ethers as highly efficient hydrogen-bond regulators for aqueous eutectic electrolytes
Source: Royal Society of Chemistry journal article supplement (doi:10.1039/d2ta03053e), 2022-01-01
Supplement: d2ta03053e5.pdf [file d2ta03053e5.pdf]

## Supporting Information

### **Protic ethers as highly efficient hydrogen-bond regulators for aqueous eutectic electrolytes**

Xuejun Lu <sup>a, †</sup>, Zhenhua Liu <sup>b, †</sup>, Li Tao <sup>a</sup>, Hao Sun <sup>b\*</sup>, Yulong Liu <sup>b</sup>, Jian Liu <sup>a\*</sup>

## Experimental

### Preparation of aqueous Li-based eutectic (ALE) electrolytes

All chemicals and reagents were analytical grade and used without further purification. The samples preparation process can be referred to previous work,<sup>[1]</sup> where all ALE-based electrolytes were synthesized in molality ( $\text{mol kg}^{-1}$ ) of the resulting solutions.

### Characterizations

NMR measurements were carried out on an AVANCE III 400MHz equipment with BBO probe, samples were placed in NMR tubes and analyzed using a separated capillary tube with deuterated methanol ( $\text{CD}_3\text{OD}$ ) as the external reference. Differential scanning calorimetry (DSC) analyses were performed in a TA instrument DSC-Q1000 under a  $\text{N}_2$  atmosphere. FTIR spectra was performed using EO-SXB IR spectrometer. Raman spectra were recorded using a SENTERRA II model with an excitation wavelength of 532 nm. Contact angle tests were obtained from a goniometer with OCA 15 model.

### Electrochemical Measurements

The ionic conductivity of ALE-based electrolytes was tested at room temperature and  $-20\text{ }^\circ\text{C}$  by two symmetric blocking stainless steel (SS) electrodes and calculated according to equation [1]:

$$\kappa=L/(R\cdot A) \quad [1]$$

where L and A are the thickness and effective contacting area between SS electrode and electrolyte, respectively, and R is the resistance obtained by electrochemical impedance spectroscopy (EIS) test.

All electrochemical measurements including cyclic voltammetry (CV), galvanostatic charge-discharge (GCD), and EIS were performed using a VSP-3e Potentiostat. Coin cell assembly (CR2032) was carried out with symmetrical active carbons (ASAC-30, Canada) electrodes and a spetrator (GF/F), GCD cycling ability was further tested in a NEWARE battery cycler (CT-4008T-5V50mA-164, Shenzhen, China).

The gravimetric capacitance (C) based on GCD curves was calculated according to equation [2]:

$$C=(I\cdot\Delta t_1)/(2m\cdot\Delta V) \quad [2]$$

where  $\Delta t_1$  (s) is the discharge time,  $\Delta V$  (V) is operation voltage excluding the IR drop, I and m are applied current and active material loading on one electrode, respectively.

The Coulombic efficiency (CE) was determined according to equation [3]:

$$CE=\Delta t_1/\Delta t_2 \quad [3]$$

where  $\Delta t_2$  (s) is the charge time.

### Computational details

All molecular dynamic (MD) simulations were carried out using the Forcite package of Material Studio software. The forcefield was simulated with COMPASS.  $\text{ALE}_{6,6}$  and  $\text{ALE-DME}_{6,6}$  with molar ratios as shown in Table S1 were added to a  $35\times 35\times 35\text{ \AA}^3$  box, respectively. The systems were equilibrated at 298 K in the NVT ensemble for 50 ps with a timestep of 1.0 fs, and the Nose thermostat was used to control the temperature.<sup>[2]</sup>

Density functional theory (DFT) computations were carried out using the Dmol<sup>3</sup> code<sup>[3,4]</sup> within the generalized gradient approximation (GGA) method in the form of the Perdew-Burke-Ernzerhof (PBE)<sup>[4,5]</sup>. The convergence energy and Monkhorst-Pack k-point mesh was set to  $1.0\times 10^{-5}$  Ha and  $3\times 3\times 1$ , respectively. During geometry optimization, the convergence tolerance was set as  $1.0\times 10^{-5}$  eV for energy, and  $0.004\text{ Ha \AA}^{-1}$  for force. A vacuum of 20  $\text{\AA}$  was used to avoid interactions between periodic images.

## Results and Discussion

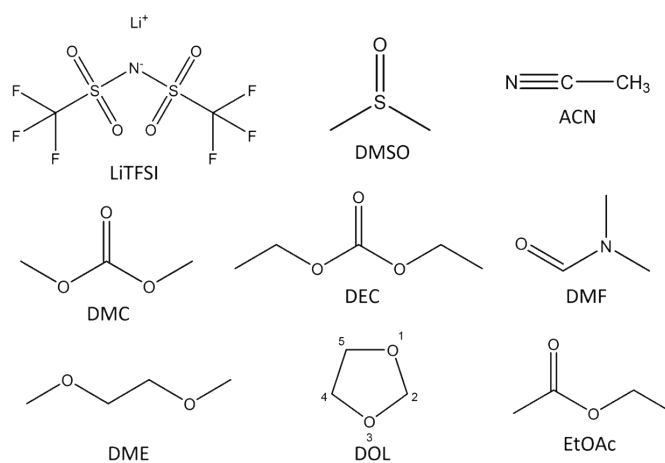

**Figure S1.** Molecular structures of LiTFSI and different solvents.

**Table S1.** Molar ratios of LiTFSI, DMSO, H<sub>2</sub>O and different solvents in various electrolytes.

| Sample                   | Molar ratio |      |                  |         |
|--------------------------|-------------|------|------------------|---------|
|                          | LiTFSI      | DMSO | H <sub>2</sub> O | Solvent |
| ALE <sub>6.6</sub>       | 0.753       | 1    | 2                | --      |
| ALE-ACN <sub>6.6</sub>   | 0.753       | 0.75 | 1.5              | 0.695   |
| ALE-DMC <sub>6.6</sub>   | 0.753       | 0.75 | 1.5              | 0.317   |
| ALE-DEC <sub>6.6</sub>   | 0.753       | 0.75 | 1.5              | 0.242   |
| ALE-DMF <sub>6.6</sub>   | 0.753       | 0.75 | 1.5              | 0.391   |
| ALE-DME <sub>6.6</sub>   | 0.753       | 0.75 | 1.5              | 0.317   |
| ALE-DOL <sub>6.6</sub>   | 0.753       | 0.75 | 1.5              | 0.386   |
| ALE-EtOAc <sub>6.6</sub> | 0.753       | 0.75 | 1.5              | 0.324   |

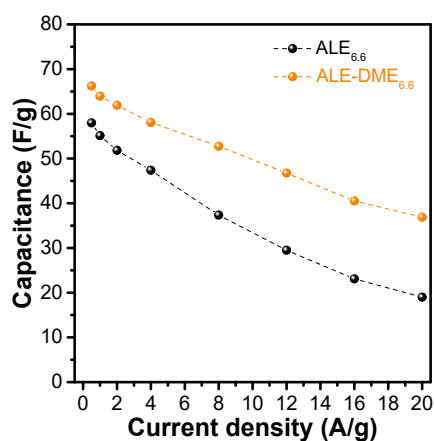

**Figure S2.** Capacitance of various ALE-based electrolytes at different current densities.

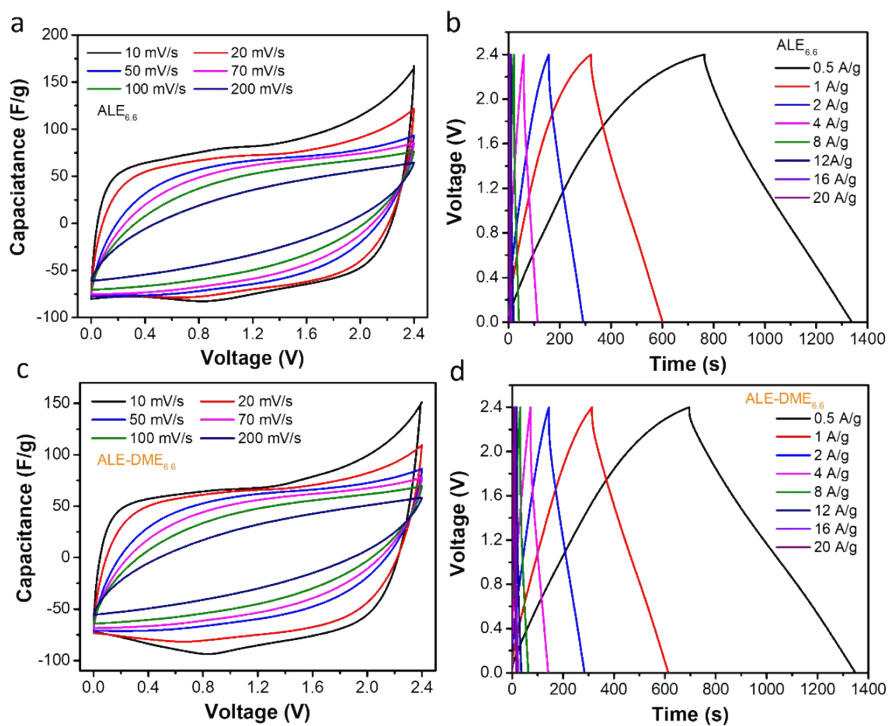

**Figure S3.** CV curves at different scan rates and GCD profiles at different current densities of ALE<sub>6,6</sub> and ALE-DME<sub>6,6</sub> electrolytes measured at room temperature.

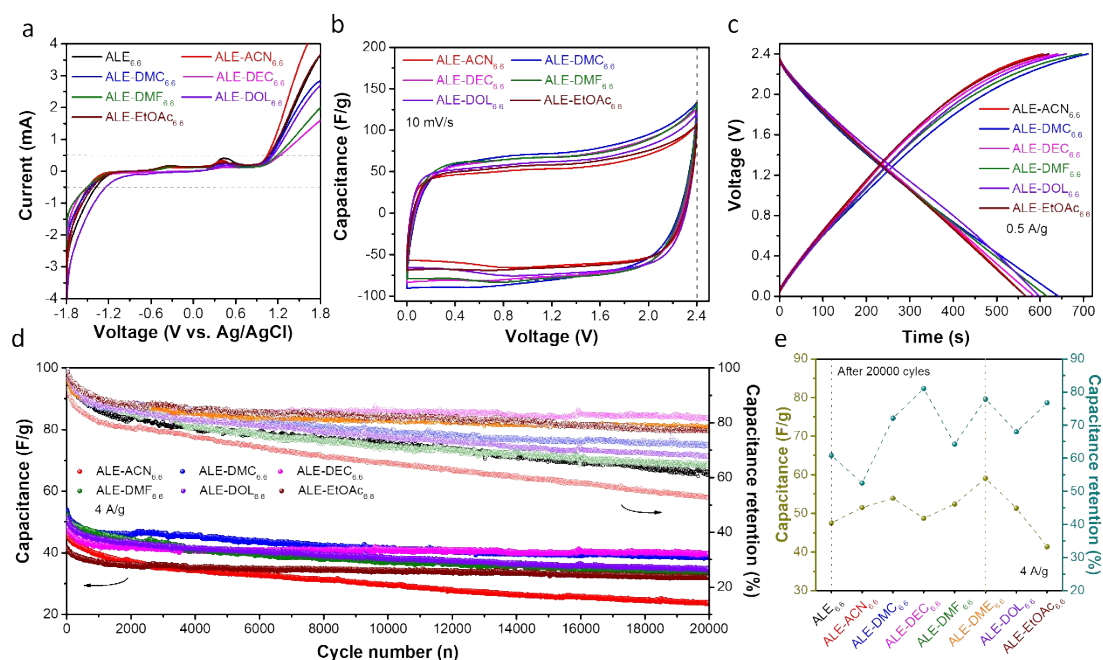

**Figure S4.** Electrochemical performance of various ALE-based electrolytes at room temperature. a) ESWs measured with linear sweep voltammetry at a scan rate of  $10 \text{ mV s}^{-1}$ . b) CV curve at a scan rate of  $10 \text{ mV s}^{-1}$ . (c) GCD profiles at a current density of  $0.5 \text{ A g}^{-1}$ . (d) Cycling performance at a current density of  $4 \text{ A g}^{-1}$ . e) Capacitance before cycling and capacitance retention after 2000 cycles at  $4 \text{ A g}^{-1}$ .

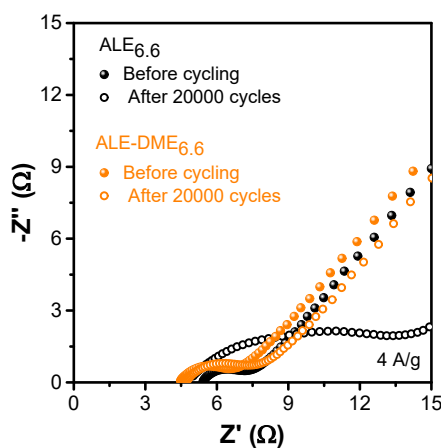

**Figure S5.** Nyquist plots of ALE<sub>6.6</sub> and ALE-DME<sub>6.6</sub> electrolytes measured before cycling and after 20000 cycles at room temperature with high frequency region magnification.

**Table S2.** Specific values of  $R_e$  and  $R_{ct}$  before and after 20000 cycling.

| Sample                   | Before cycling |          | After 20000 cycles |          |
|--------------------------|----------------|----------|--------------------|----------|
|                          | $R_e$          | $R_{ct}$ | $R_e$              | $R_{ct}$ |
| ALE <sub>6.6</sub>       | 5.06           | 2.37     | 5.42               | 8.63     |
| ALE-ACN <sub>6.6</sub>   | 2.92           | 1.59     | 10.36              | 28.25    |
| ALE-DMC <sub>6.6</sub>   | 4.85           | 2.00     | 7.36               | 2.49     |
| ALE-DEC <sub>6.6</sub>   | 5.68           | 2.29     | 6.85               | 3.46     |
| ALE-DMF <sub>6.6</sub>   | 5.51           | 2.16     | 23.60              | 4.90     |
| ALE-DME <sub>6.6</sub>   | 4.47           | 1.96     | 4.78               | 2.65     |
| ALE-DOL <sub>6.6</sub>   | 4.52           | 2.03     | 6.95               | 5.02     |
| ALE-EtOAc <sub>6.6</sub> | 5.17           | 1.92     | 13.52              | 5.54     |

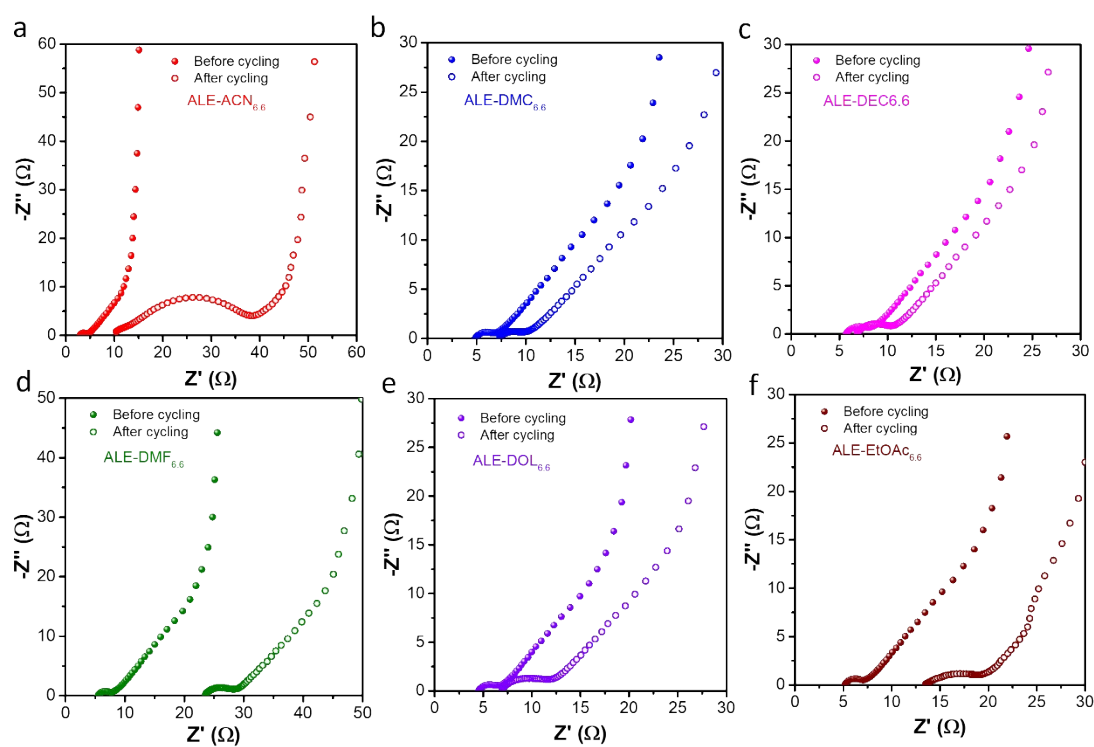

**Figure S6.** Nyquist plots of other ALE-based electrolytes measured before cycling and after 20000 cycles at room temperature.

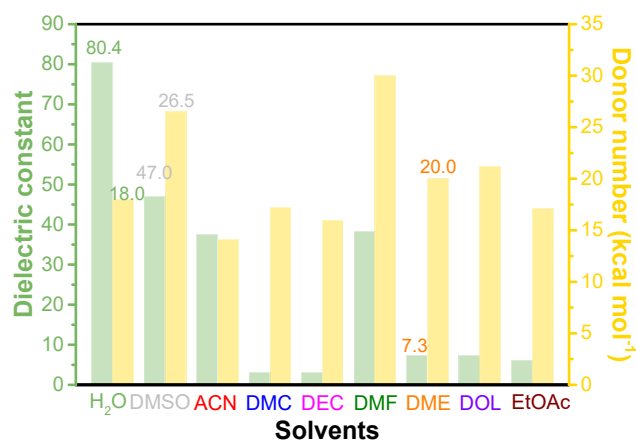

**Figure S7.** Dielectric constant and DN of H<sub>2</sub>O and different organic solvents.

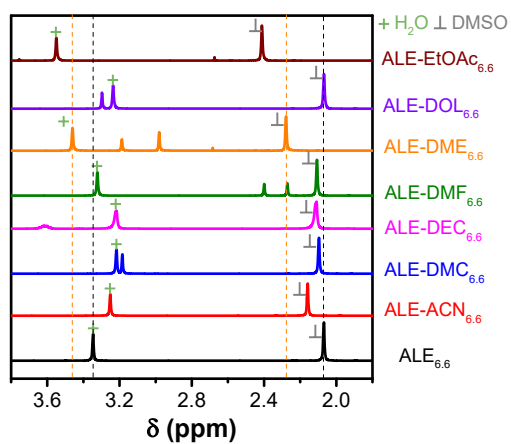

**Figure S8.** <sup>1</sup>H NMR spectra of ALE<sub>6.6</sub> and ALE-based electrolytes.

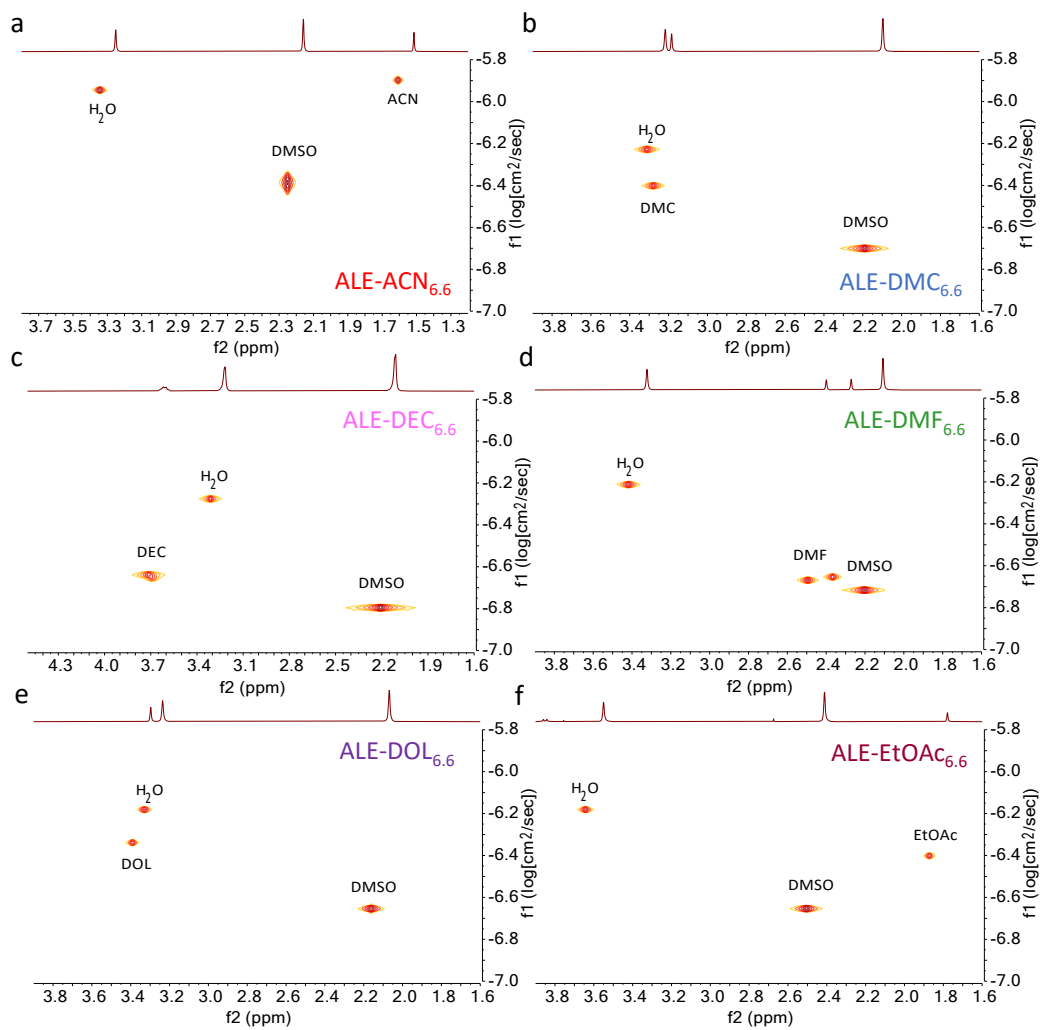

**Figure S9.**  $^1\text{H}$  DOSY spectra of the rest ALE-based electrolytes.

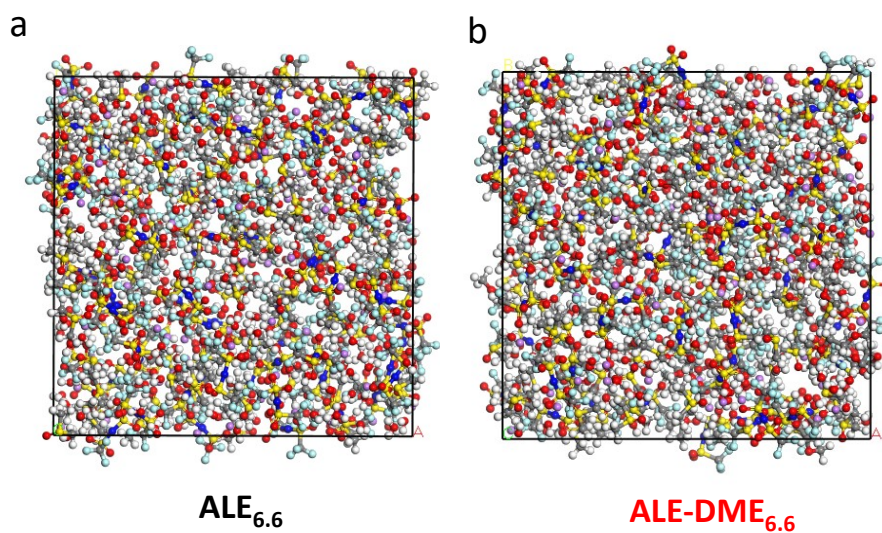

**Figure S10.** Snapshots of a) ALE<sub>6.6</sub> and b) ALE-DME<sub>6.6</sub> electrolyte structures in MD simulation.



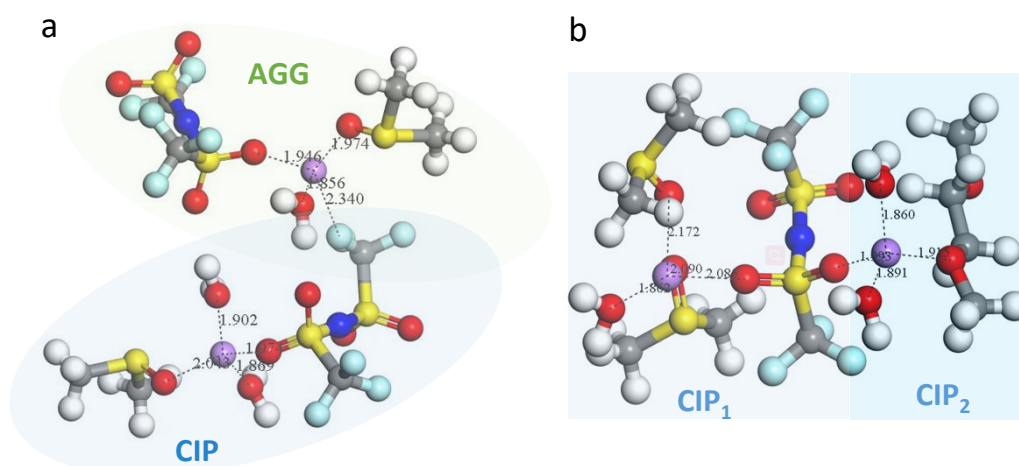

**Figure S11.** Structures of the most probably inner solvation shells of a)  $\text{ALE}_{6,6}$  and b)  $\text{ALE-DME}_{6,6}$  electrolytes from MD simulation.

In ALE-based electrolytes, the solvent molecules are outnumbered by  $\text{Li}^+$  and/or  $\text{TFSI}^-$  susceptible to solvation so that ionic species such as contact ion pairs (CIPs) and ionic aggregates (AGGs) co-exist in the highly concentrated solution. In Figure S11a, typical CIP and AGG species are sharing the one or two anions of  $\text{TFSI}^-$  in  $\text{ALE}_{6,6}$  electrolyte considering the participation of DMSO and  $\text{H}_2\text{O}$ . As elucidated in previous work, we hypothesized the formula of  $\text{Li}^+$ -solvated DMSO/ $\text{H}_2\text{O}$  complexes and  $\text{TFSI}^-$  anions as  $\text{Li}^+(\text{DMSO})_a(\text{H}_2\text{O})_b(\text{TFSI}^-)_c$  with  $a + b + c = 4$  according to CIP and AGG formation.<sup>[1]</sup> The corresponding results delivered the proof of solvation affinity and structure stability among  $\text{LiTFSI}$  and eutectic mixtures of DMSO/ $\text{H}_2\text{O}$ . Furthermore, the DME regulator introduced a CIP difference as  $\text{CP}_1$  (e.g.,  $\text{Li}^+$ -solvated with two DMSO, one  $\text{H}_2\text{O}$ , and  $\text{TFSI}^-$ ) and  $\text{CP}_2$  (e.g.,  $\text{Li}^+$ -solvated with one DME, two  $\text{H}_2\text{O}$ , and  $\text{TFSI}^-$ ) (Figure S11b). This regulation agent (DME) shows the ability to weaken the solvation ability of the two oxygen atoms or ethoxy groups, promoting an increased number of  $\text{TFSI}^-$  solvating structures (e.g., CIPs). These results above are evidential to combine Raman, FTIR, MD, and electrochemical experimental consequence, which generally provides support from molecular views.

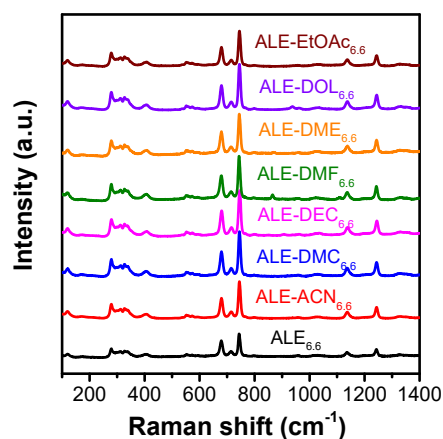

**Figure S12.** Raman spectrum of ALE<sub>6.6</sub> and ALE-based electrolytes in the range of 100–1400 cm<sup>-1</sup>.

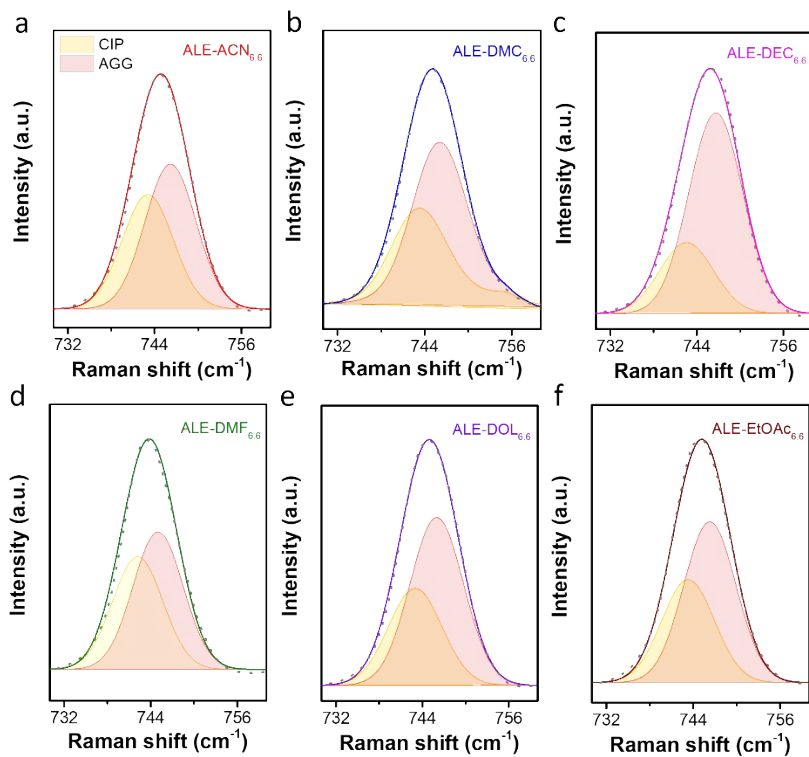

**Figure S13.** Integrated Raman spectrum of the rest ALE-based electrolytes in the range of 730–760 cm<sup>-1</sup>.

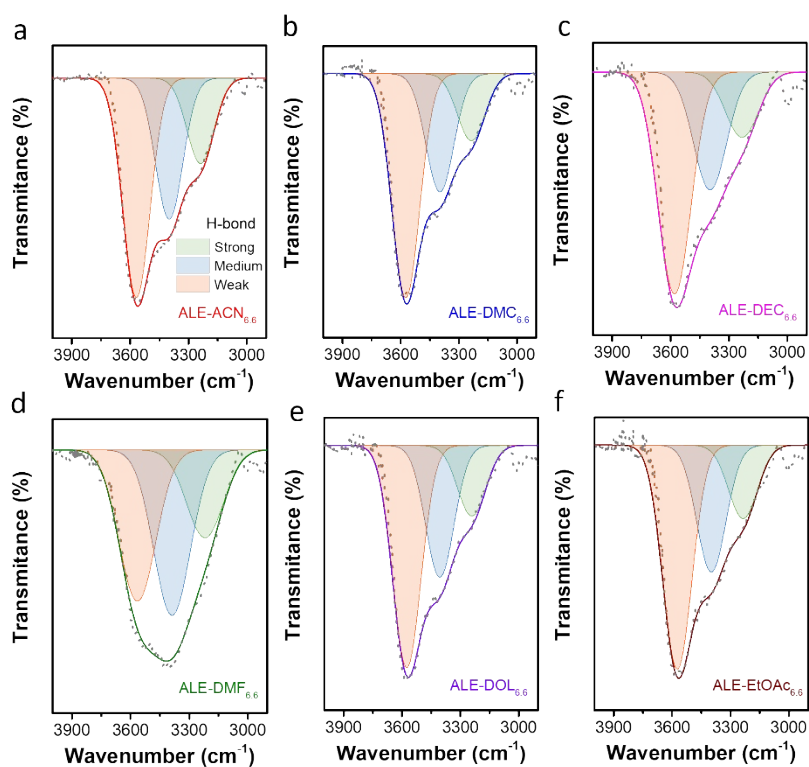

**Figure S14.** Integrated FTIR spectrum of the rest ALE-based electrolytes in the range of 2900–4000  $\text{cm}^{-1}$ .

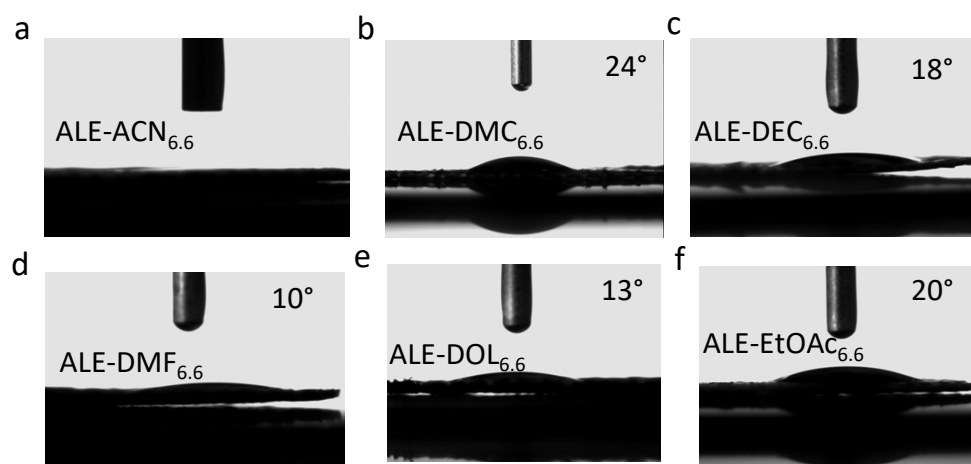

**Figure S15.** Contact angle measurements of the rest ALE-based electrolytes.

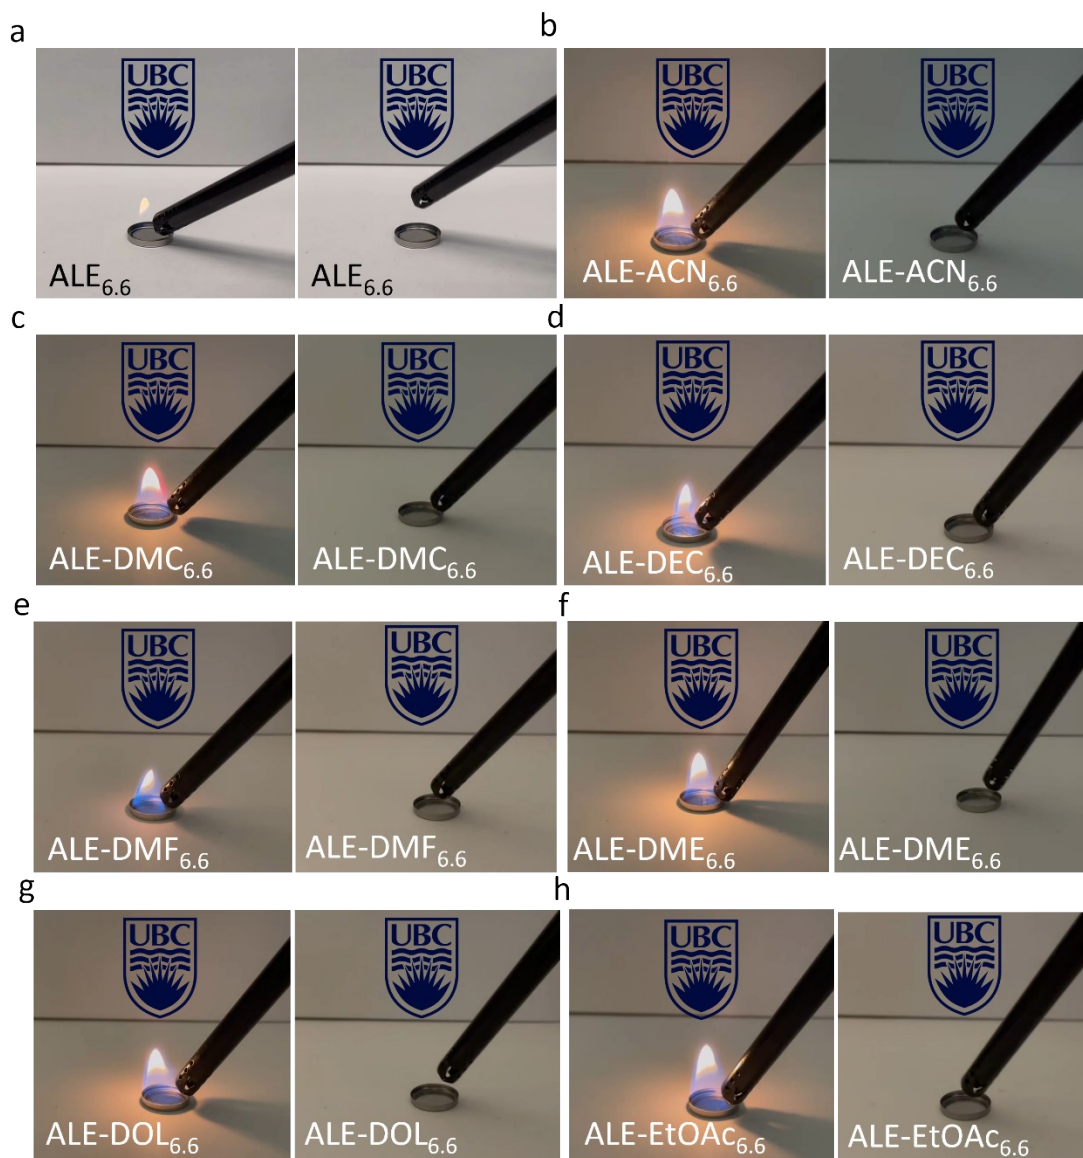

**Figure S16.** Flammability tests of  $\text{ALE}_{6.6}$  and ALE-based electrolytes.

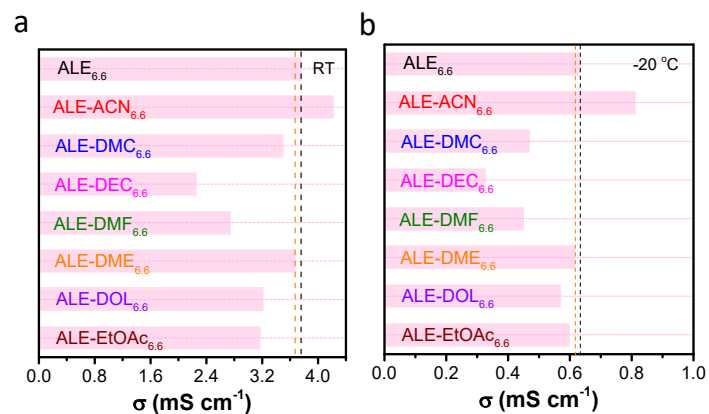

**Figure S17.** Ionic conductivity of  $\text{ALE}_{6.6}$  and ALE-based electrolytes at a) room temperature (RT) and b)  $-20\text{ }^{\circ}\text{C}$ .

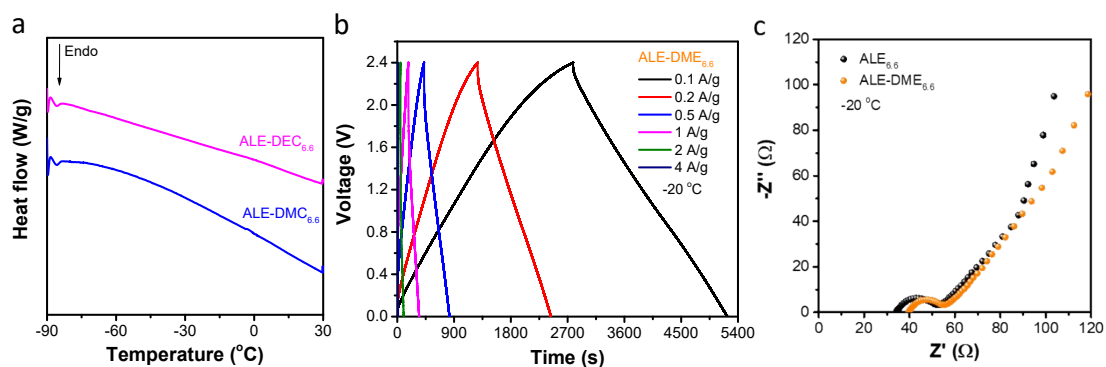

**Figure S18.** A) DSC spectra of  $\text{ALE-DMC}_{6.6}$  and  $\text{ALE-DEC}_{6.6}$ . b) GCD profiles of  $\text{ALE-DME}_{6.6}$  with different current densities at  $-20\text{ }^{\circ}\text{C}$ . c) Nyquist plots of  $\text{ALE}_{6.6}$  and  $\text{ALE-DME}_{6.6}$  at  $-20\text{ }^{\circ}\text{C}$ .

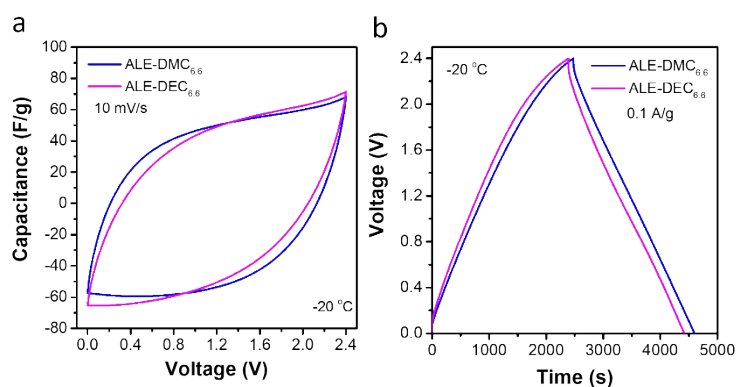

**Figure S19.** a) CV curves at  $10 \text{ mV s}^{-1}$  b) GCD profiles at  $0.1 \text{ A g}^{-1}$  of ALE-DMC<sub>6,6</sub> and ALE-DEC<sub>6,6</sub> at  $-20 \text{ }^\circ\text{C}$ .

**Table S3.** The comparison of capacitance, cyclability, and capacity retention after cycling reported for SCs using different electrodes and electrolytes and operating at different temperatures.

| Electrolytes                                                                                               | Electrodes                  | T (°C) | Capacitance (F g <sup>-1</sup> )    | Cycles number (n)                  | Capacitance Retention | Ref.      |
|------------------------------------------------------------------------------------------------------------|-----------------------------|--------|-------------------------------------|------------------------------------|-----------------------|-----------|
| ALE-DME <sub>6,6</sub>                                                                                     | ASAC-30                     | 25     | 66.2<br>(0.5 A g <sup>-1</sup> )    | 20000<br>(4 A g <sup>-1</sup> )    | ~80.0%                | This work |
|                                                                                                            |                             | -20    | 51.6<br>(0.1 A g <sup>-1</sup> )    | 8000<br>(1 A g <sup>-1</sup> )     | 80.0%                 |           |
| ALE <sub>6,6</sub>                                                                                         | ASAC-30                     | 25     | 58.0<br>(0.5 A g <sup>-1</sup> )    | 20000<br>(4 A g <sup>-1</sup> )    | 60.0%                 | This work |
| 20m LiTFSI-H <sub>2</sub> O                                                                                | Petal-derived porous carbon | 25     | 50.0<br>(0.5 A g <sup>-1</sup> )    | 5000<br>(2 A g <sup>-1</sup> )     | 84.0%                 | [7]       |
|                                                                                                            |                             | -10    | 34.0<br>(0.5 A g <sup>-1</sup> )    | 5000<br>(2 A g <sup>-1</sup> )     | 38.0%                 |           |
| 5m LiTFSI-H <sub>2</sub> O/CH <sub>3</sub> CN                                                              | Activated carbon            | 25     | 27.0<br>(1 A g <sup>-1</sup> )      | 14000<br>(6 A g <sup>-1</sup> )    | 81.0%                 | [8]       |
|                                                                                                            |                             | -30    | 21.8<br>(1 A g <sup>-1</sup> )      | --                                 | --                    |           |
| (NaClO <sub>4</sub> ) <sub>1.7</sub> -(H <sub>2</sub> O) <sub>4.7</sub> /(CH <sub>3</sub> CN) <sub>3</sub> | Activated carbon            | 20     | 31.8<br>(20 mV s <sup>-1</sup> )    | --                                 | --                    | [9]       |
|                                                                                                            |                             | -50    | 27.5<br>(20 mV s <sup>-1</sup> )    | ca. 7000<br>(2 A g <sup>-1</sup> ) | 91.0%                 |           |
| 3.5m Mg(ClO <sub>4</sub> ) <sub>2</sub> hydrated eutectic                                                  | Activated carbon            | 25     | 24.6<br>(1 A g <sup>-1</sup> )      | 10000<br>(4 A g <sup>-1</sup> )    | 92.6%                 | [10]      |
|                                                                                                            |                             | -40    | 18.6<br>(1 A g <sup>-1</sup> )      | 6000<br>(4 A g <sup>-1</sup> )     | ca. 100%              |           |
| 3m LiTFSI sulfolane/H <sub>2</sub> O                                                                       | Activated carbon            | 25     | 106.0<br>(0.5 1 A g <sup>-1</sup> ) | 10000<br>(10 A g <sup>-1</sup> )   | 93.0%                 | [11]      |

## References

- [1] X. Lu, R.-J. Jiménez-Riobóo, D. Leech, M.-C. Gutiérrez, M.-L. Ferrer, Francisco del Monte. Aqueous-Eutectic-in-Salt Electrolytes for High-Energy-Density Supercapacitors with an Operational Temperature Window of 100 °C, from -35 to +65 °C. *ACS Appl. Mater. Interfaces* **2020**, 12, 26, 29181–29193.
- [2] H. J. Liang, Z.Y. Gu, X. X. Zhao, J.Z. Guo, J. L. Yang, W.H. Li, B. Li, Z. M. Liu, W.L. Li, X. L. Wu. Ether-based electrolyte chemistry towards high-voltage and long-life Na-ion full batteries. *Angew. Chem. Int. Ed.* **2021**, 60, 2–12.
- [3] B. G. Johnson, P. M. W. Gill, J. A. People. The performance of a family of density functional methods. *J. Chem. Phys.* **1993**, 98, 5612-5626.
- [4] J.P. Perdew, J.A. Chevary, S.H. Vosko, K.A. Jackson, M.R. Pederson, D.J. Singh, C. Fiolhais. Atoms, molecules, solids, and surfaces: applications of the generalized gradient approximation for exchange and correlation. *Phys. Rev. B* **1992**, 46, 6671.
- [5] J.P. Perdew, K. Burkner, Y. Wang. Generalized gradient approximation for the exchange-correlation hole of a many-electron system. *Phys. Rev. B* **1996**, 54, 16533–16539.
- [6] J.P. Perdew, Y. Wang. Accurate and simple analytic representation of the electron gas correlation energy. *Phys. Rev. B* **1992**, 45, 13244.
- [7] C. Naresh, N.C. Osti, A. Gallegos, B. Dyatkin, J. Wu, Y. Gogotsi, E. Mamontov. Mixed ionic liquid improves electrolyte dynamics in supercapacitors. *J. Phys. Chem. C* **2018**, 122, 10476-10481.
- [8] Q. Dou, S. Lei, D.-W. Wang, Q. Zhang, D. Xiao, H. Guo, A. Wang, H. Yang, Y. Li, S. Shi, X. Yan. Safe and high-rate supercapacitors based on an “Acetonitrile/Water in Salt” hybrid electrolyte. *Energy Environ. Sci.* **2018**, 11, 3212-3219.
- [9] Y. Sun, Y. Wang, L. Liu, B. Liu, Q. Zhang, D. Wu, H. Zhang, X. Yan. Towards the understanding of acetonitrile suppressing salt precipitation mechanism in a water-in-salt electrolyte for low-temperature supercapacitors. *J. Mater. Chem. A* **2020**, 8, 17998-11685.
- [10] M. Zhong, Q.F. Tang, Y.W. Zhu, X.Y. Chen, Z.J. Zhang. An alternative electrolyte of deep eutectic solvent by choline chloride and ethylene glycol for wide temperature range supercapacitors. *J. Power Sources* **2020**, 452, 227847.
- [11] X., Cheng, J., Yuan, J., Hu, S., Chen, H., Yan, W., Yang, W., Li, Y., Dai. 2.5 V high-performance aqueous and semi-solid-state symmetric supercapacitors enabled by 3 m sulfolane-saturated aqueous electrolytes. *Energy Technol.* **2022**, 2200157.
